# Supplementary material for: High-resolution digital elevation models and orthomosaics generated from historical aerial photographs (since the 1960s) of the Bale Mountains in Ethiopia
Source: Copernicus journal article supplement (doi:10.5194/essd-15-5535-2023), 2023-12-08
Supplement: Supplementary file 1 [file essd-15-5535-2023-supplement.pdf]

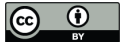

*Supplement of*

**High-resolution digital elevation models and orthomosaics generated from historical aerial photographs (since the 1960s) of the Bale Mountains in Ethiopia**

**Mohammed Ahmed Muhammed et al.**

*Correspondence to:* Mohammed Ahmed Muhammed ([mohammed.muhammed@geo.uni-marburg.de](mailto:mohammed.muhammed@geo.uni-marburg.de), [mohammed.ahmedgis@aau.edu.et](mailto:mohammed.ahmedgis@aau.edu.et))

The copyright of individual parts of the supplement might differ from the article licence.

**Table S1. Camera number, calibrated focal length (CFL) in millimetres, magazine number, roll number, exposure date, photo number, and lens serial number for historical aerial photographs (HAPs) for the year 1965/67.**

| Camera number | CFL (mm) | Magazine number | Roll number | Exposure date | Photo number (from to)             | Lens serial number |
|---------------|----------|-----------------|-------------|---------------|------------------------------------|--------------------|
| 63-142        | 151.625  | 63-144          | 140         | 13-Feb-65     | 12842 – 12828<br>and 12793 - 12809 | 114/486            |
| 62-048        | 152.688  | 64-010          | 324         | 30-Nov-67     | 34400 - 34384                      | 497/126            |
| 63-048        | 150.996  | 64-010          | 338         | 5-Dec-67      | 36252 - 36268                      | 237/570            |
| 63-094        | 151.338  | 64-151          | 333         | 3-Dec-67      | 35406 - 35422                      | 324                |
| 63-048        | 150.996  | 64-128          | 348         | 10-Dec-67     | 37750 - 37735                      | 237/570            |
| 63-048        | 150.996  | 64-148          | 349         | 10-Dec-67     | 37830 - 37844                      | 237/570            |
| 62-048        | 152.688  | 64-010          | 376         | 18-Dec-67     | 41006 - 41021                      | 497/126            |
| 63-111        | 152.263  | 64-128          | 373         | 17-Dec-67     | 40723 - 40709                      | 522                |

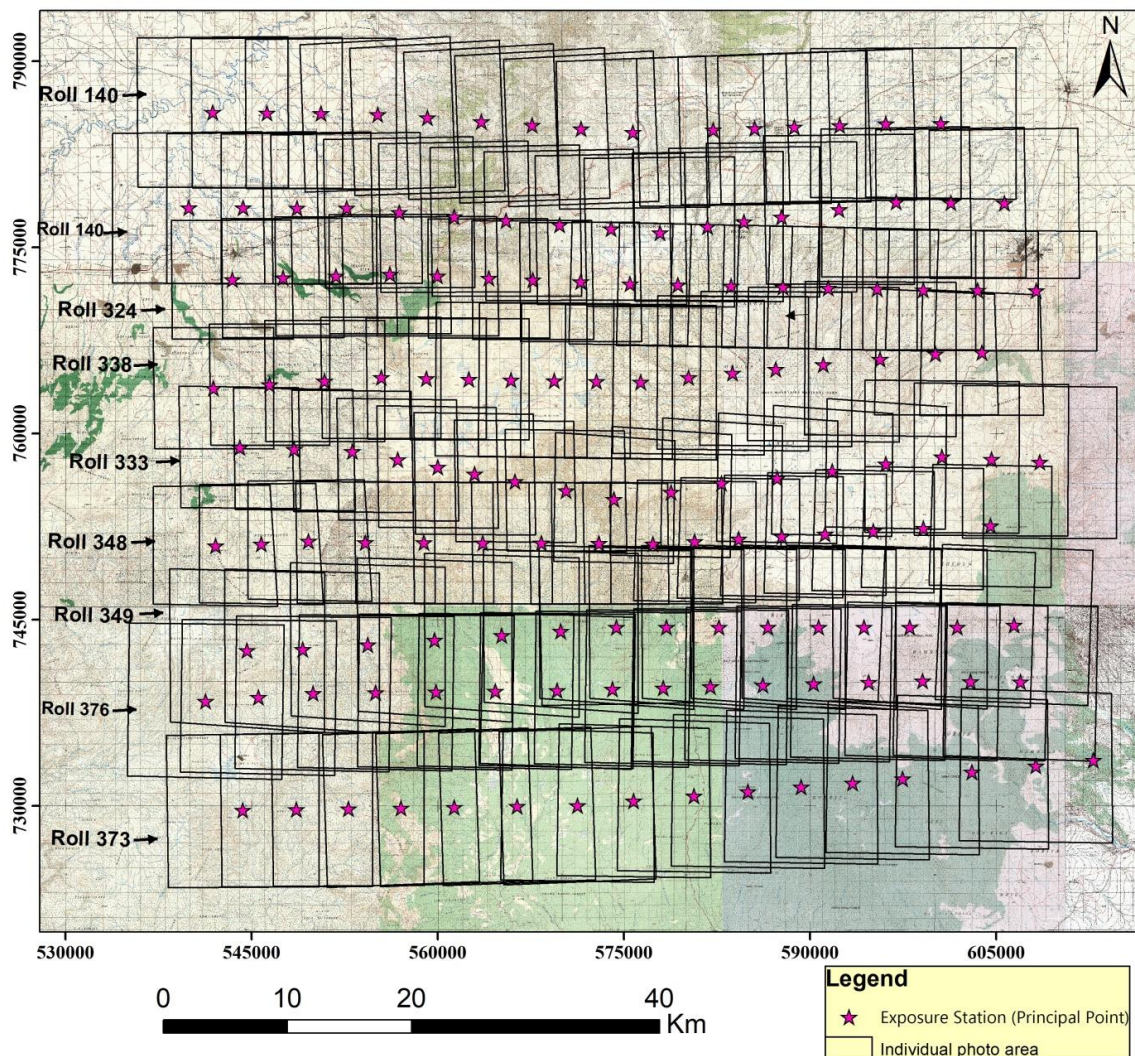

**Figure S1. Block diagram (flight index) showing camera exposure stations (ground principal points), areal extent, forward overlap, and side lap of individual aerial photographs for the year 1965/67 (source background map: Ethiopian Geospatial Information Institute).**

**Table S2. Roll number, strip number, acquisition date, and photo number ranges for historical aerial photographs for the year 1984.**

| Roll number | Strip number | Acquisition date | Photo number (from to) |
|-------------|--------------|------------------|------------------------|
| R- S9       | 27           | 17-01-1984       | 1714 - 1725            |
| R- S9       | 26           | 17-01-1984       | 1680 - 1696            |
| R- S9       | 25           | 17-01-1984       | 1643 - 1660            |
| R- S9       | 24           | 17-01-1984       | 1606 - 1624            |
| R- S8       | 23           | 17-01-1984       | 1569 - 1585            |
| R- S8       | 22           | 16-01-1984       | 1533 - 1548            |
| R- S7       | 21           | 16-01-1984       | 1498 - 1516            |
| R- S7       | 20           | 16-01-1984       | 1463 - 1480            |
| R- S6       | 19           | 15-01-1984       | 1426 - 1443            |

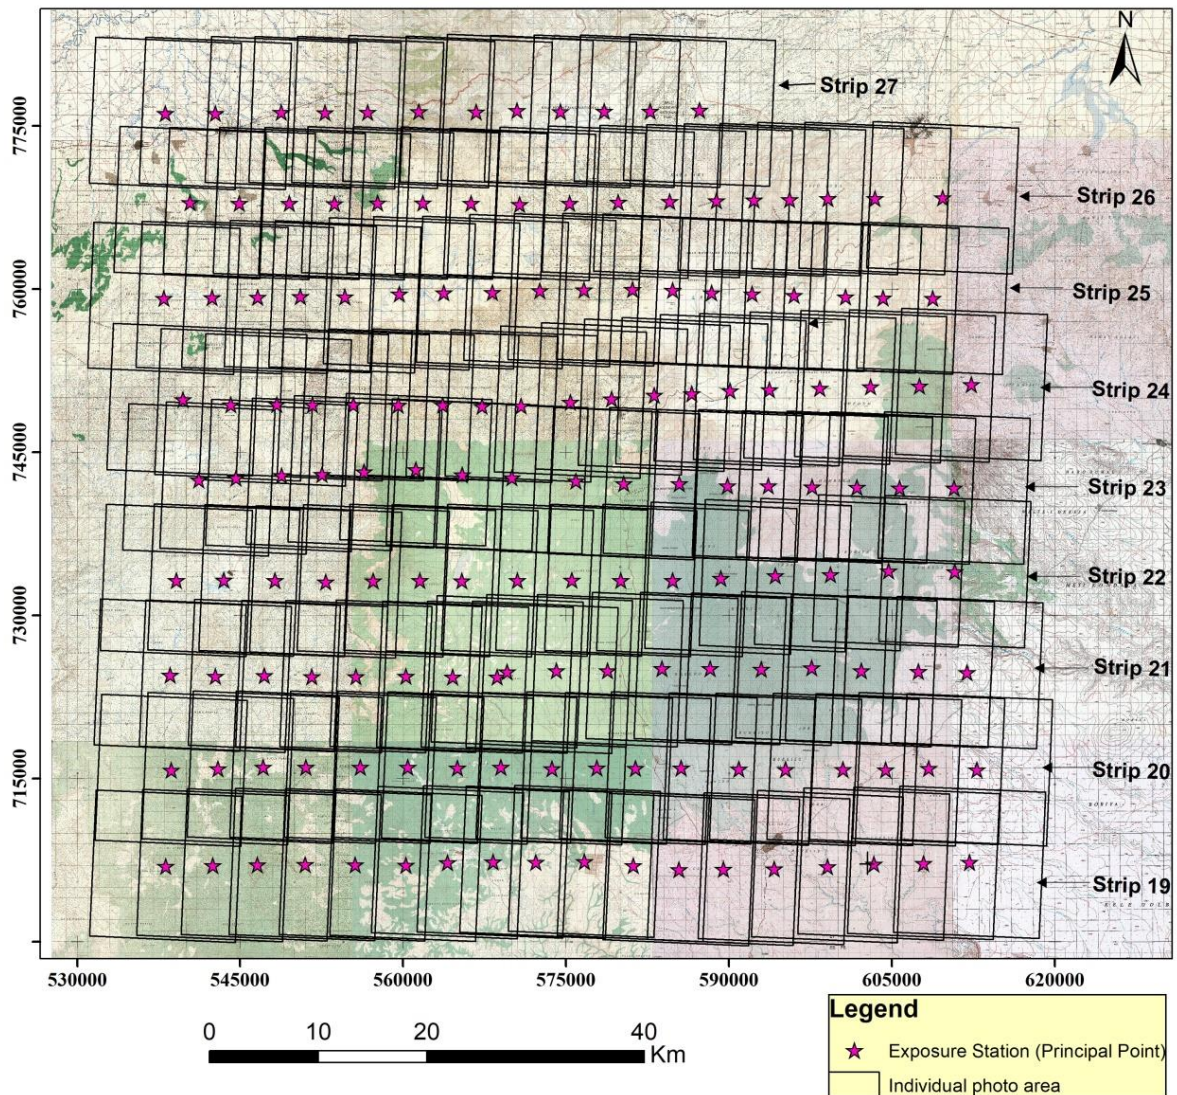

**Figure S2. Block diagram (flight index) showing camera exposure stations (ground principal points), areal extent, forward overlap, and side lap of individual aerial photographs for the year 1984 (source background map: Ethiopian Geospatial Information Institute).**

**Table S3. Easting, northing, and altitude of the camera positions (principal points) for the year 1967 using the Adindan UTM Zone 37 North reference system. Each image indicates the roll number and photo number used with file name extension.**

| Label                    | X/Easting | Y/Northing | Z/Altitude |
|--------------------------|-----------|------------|------------|
| R_ROLL_333_0.0_35406.jpg | 544042    | 758873     | 12564      |
| R_ROLL_333_0.0_35407.jpg | 548427    | 758719     | 12653      |
| R_ROLL_333_0.0_35408.jpg | 553115    | 758554     | 12965      |
| R_ROLL_333_0.0_35409.jpg | 556768    | 757881     | 13184      |
| R_ROLL_333_0.0_35410.tif | 559984    | 757290     | 13236      |
| R_ROLL_333_0.0_35411.tif | 562965    | 756741     | 13046      |
| R_ROLL_333_0.0_35412.tif | 566222    | 756142     | 12851      |
| R_ROLL_333_0.0_35413.tif | 570314    | 755389     | 12296      |
| R_ROLL_333_0.0_35414.tif | 574181    | 754678     | 13170      |
| R_ROLL_333_0.0_35415.tif | 578777    | 755277     | 13427      |
| R_ROLL_333_0.0_35416.tif | 582863    | 755979     | 13600      |
| R_ROLL_333_0.0_35417.tif | 587342    | 756394     | 13590      |
| R_ROLL_333_0.0_35418.tif | 591780    | 756972     | 13615      |
| R_ROLL_333_0.0_35419.tif | 596104    | 757536     | 13629      |
| R_ROLL_333_0.0_35420.tif | 600613    | 758124     | 13510      |
| R_ROLL_333_0.0_35421.tif | 604600    | 757907     | 13175      |
| R_ROLL_333_0.0_35422.tif | 608505    | 757696     | 12590      |
| Roll_R_140_00_12793.tif  | 539931    | 778186     | 11838      |
| Roll_R_140_00_12794.tif  | 544297    | 778170     | 11857      |
| Roll_R_140_00_12795.tif  | 548663    | 778153     | 11910      |
| Roll_R_140_00_12796.tif  | 552666    | 778138     | 11996      |
| Roll_R_140_00_12797.tif  | 556881    | 777808     | 12064      |
| Roll_R_140_00_12798.tif  | 561324    | 777460     | 12611      |
| Roll_R_140_00_12799.tif  | 565482    | 777135     | 12649      |
| Roll_R_140_00_12800.tif  | 569805    | 776796     | 13256      |
| Roll_R_140_00_12801.tif  | 573947    | 776472     | 13040      |
| Roll_R_140_00_12802.tif  | 577896    | 776163     | 12979      |
| Roll_R_140_00_12803.tif  | 581737    | 776664     | 12953      |
| Roll_R_140_00_12804.tif  | 584673    | 777048     | 12977      |
| Roll_R_140_00_12805.tif  | 587687    | 777442     | 12978      |
| Roll_R_140_00_12806.tif  | 592310    | 778045     | 12787      |
| Roll_R_140_00_12807.tif  | 596922    | 778648     | 12522      |
| Roll_R_140_00_12808.tif  | 601330    | 778593     | 12276      |
| Roll_R_140_00_12809.tif  | 605647    | 778541     | 12120      |
| Roll_R_140_00_12828.tif  | 600533    | 784959     | 12311      |
| Roll_R_140_00_12829.tif  | 596084    | 784937     | 12299      |
| Roll_R_140_00_12830.tif  | 592375    | 784811     | 12516      |
| Roll_R_140_00_12831.tif  | 588712    | 784686     | 12613      |
| Roll_R_140_00_12832.tif  | 585535    | 784579     | 12572      |
| Roll_R_140_00_12833.tif  | 582194    | 784465     | 12876      |
| Roll_R_140_00_12834.tif  | 575702    | 784245     | 12730      |
| Roll_R_140_00_12835.tif  | 571547    | 784540     | 12781      |
| Roll_R_140_00_12836.tif  | 567599    | 784821     | 12471      |
| Roll_R_140_00_12837.tif  | 563495    | 785112     | 12841      |
| Roll_R_140_00_12838.tif  | 559148    | 785421     | 12311      |

| Label                   | X/Easting | Y/Northing | Z/Altitude |
|-------------------------|-----------|------------|------------|
| Roll_R_140_00_12839.tif | 555156    | 785705     | 12027      |
| Roll_R_140_00_12840.tif | 550579    | 785765     | 11864      |
| Roll_R_140_00_12841.tif | 546222    | 785822     | 11837      |
| Roll_R_140_00_12842.tif | 541857    | 785879     | 11818      |
| Roll_R_324_00_34384.tif | 608200    | 771503     | 12240      |
| Roll_R_324_00_34385.tif | 603489    | 771530     | 12478      |
| Roll_R_324_00_34386.tif | 599101    | 771554     | 12827      |
| Roll_R_324_00_34387.tif | 595398    | 771639     | 12839      |
| Roll_R_324_00_34388.tif | 591445    | 771715     | 13178      |
| Roll_R_324_00_34389.tif | 587796    | 771791     | 13328      |
| Roll_R_324_00_34390.tif | 583624    | 771879     | 13291      |
| Roll_R_324_00_34391.tif | 579332    | 771969     | 13010      |
| Roll_R_324_00_34392.tif | 575476    | 772050     | 12993      |
| Roll_R_324_00_34393.tif | 571513    | 772209     | 13115      |
| Roll_R_324_00_34394.tif | 567648    | 772364     | 13079      |
| Roll_R_324_00_34395.tif | 564104    | 772506     | 12750      |
| Roll_R_324_00_34396.tif | 559974    | 772671     | 12682      |
| Roll_R_324_00_34397.tif | 556125    | 772826     | 12331      |
| Roll_R_324_00_34398.tif | 551802    | 772678     | 12211      |
| Roll_R_324_00_34399.tif | 547517    | 772532     | 12049      |
| Roll_R_324_00_34400.tif | 543436    | 772393     | 11991      |
| Roll_R_338_00_36252.tif | 541912    | 763648     | 12331      |
| Roll_R_338_00_36253.tif | 546433    | 763930     | 12347      |
| Roll_R_338_00_36254.tif | 550881    | 764208     | 12623      |
| Roll_R_338_00_36255.tif | 555443    | 764493     | 12925      |
| Roll_R_338_00_36256.tif | 559064    | 764430     | 13183      |
| Roll_R_338_00_36257.tif | 562500    | 764371     | 13182      |
| Roll_R_338_00_36258.tif | 565891    | 764313     | 13230      |
| Roll_R_338_00_36259.tif | 569382    | 764253     | 13118      |
| Roll_R_338_00_36260.tif | 572773    | 764194     | 13133      |
| Roll_R_338_00_36261.tif | 576334    | 764133     | 13258      |
| Roll_R_338_00_36262.tif | 580193    | 764503     | 13414      |
| Roll_R_338_00_36263.tif | 583754    | 764845     | 13375      |
| Roll_R_338_00_36264.tif | 587225    | 765178     | 13485      |
| Roll_R_338_00_36265.tif | 591057    | 765545     | 13329      |
| Roll_R_338_00_36266.tif | 595639    | 765985     | 13443      |
| Roll_R_338_00_36267.tif | 600101    | 766413     | 13053      |
| Roll_R_338_00_36268.tif | 603826    | 766511     | 12735      |
| Roll_R_348_00_37735.tif | 604519    | 752548     | 12821      |
| Roll_R_348_00_37736.tif | 599103    | 752350     | 13437      |
| Roll_R_348_00_37737.tif | 595075    | 752119     | 13494      |
| Roll_R_348_00_37738.tif | 591208    | 751896     | 13479      |
| Roll_R_348_00_37739.tif | 587718    | 751696     | 13373      |
| Roll_R_348_00_37740.tif | 584224    | 751495     | 12910      |
| Roll_R_348_00_37741.tif | 580698    | 751292     | 12594      |
| Roll_R_348_00_37742.tif | 577333    | 751099     | 12970      |
| Roll_R_348_00_37743.tif | 572972    | 751152     | 12159      |

| Label                   | X/Easting | Y/Northing | Z/Altitude |
|-------------------------|-----------|------------|------------|
| Roll_R_348_00_37744.tif | 568328    | 751169     | 11821      |
| Roll_R_348_00_37745.tif | 563606    | 751186     | 12139      |
| Roll_R_348_00_37746.tif | 558883    | 751204     | 11931      |
| Roll_R_348_00_37747.tif | 554160    | 751221     | 12248      |
| Roll_R_348_00_37748.tif | 549573    | 751329     | 13123      |
| Roll_R_348_00_37749.tif | 545782    | 751086     | 12664      |
| Roll_R_348_00_37750.tif | 542089    | 750945     | 12902      |
| Roll_R_349_00_37830.tif | 544632    | 742502     | 12521      |
| Roll_R_349_00_37831.tif | 549102    | 742608     | 12782      |
| Roll_R_349_00_37832.tif | 554358    | 742977     | 12257      |
| Roll_R_349_00_37833.tif | 559737    | 743354     | 11637      |
| Roll_R_349_00_37834.tif | 565142    | 743732     | 11437      |
| Roll_R_349_00_37835.tif | 569895    | 744065     | 11499      |
| Roll_R_349_00_37836.tif | 574387    | 744380     | 11748      |
| Roll_R_349_00_37837.tif | 578414    | 744381     | 11992      |
| Roll_R_349_00_37838.tif | 582660    | 744382     | 12386      |
| Roll_R_349_00_37839.tif | 586589    | 744383     | 12404      |
| Roll_R_349_00_37840.tif | 590677    | 744384     | 12785      |
| Roll_R_349_00_37841.tif | 594328    | 744385     | 13202      |
| Roll_R_349_00_37842.tif | 598019    | 744386     | 13142      |
| Roll_R_349_00_37843.tif | 601840    | 744387     | 12293      |
| Roll_R_349_00_37844.tif | 606427    | 744568     | 12056      |
| Roll_R_373_00_40708.tif | 612827    | 733667     | 10813      |
| Roll_R_373_00_40709.tif | 608189    | 733217     | 11151      |
| Roll_R_373_00_40710.tif | 603027    | 732717     | 11223      |
| Roll_R_373_00_40711.tif | 597443    | 732176     | 11582      |
| Roll_R_373_00_40712.tif | 593409    | 731846     | 11548      |
| Roll_R_373_00_40713.tif | 589272    | 731507     | 11329      |
| Roll_R_373_00_40714.tif | 584982    | 731156     | 11324      |
| Roll_R_373_00_40715.tif | 580640    | 730800     | 11341      |
| Roll_R_373_00_40716.tif | 575781    | 730402     | 11266      |
| Roll_R_373_00_40717.tif | 571254    | 730032     | 11238      |
| Roll_R_373_00_40718.tif | 566394    | 729957     | 11213      |
| Roll_R_373_00_40719.tif | 561317    | 729879     | 11294      |
| Roll_R_373_00_40720.tif | 557034    | 729813     | 11781      |
| Roll_R_373_00_40721.tif | 552793    | 729748     | 12097      |
| Roll_R_373_00_40722.tif | 548606    | 729697     | 11809      |
| Roll_R_373_00_40723.tif | 544275    | 729644     | 11618      |
| Roll_R_376_00_41006.tif | 541296    | 738426     | 12094      |
| Roll_R_376_00_41007.tif | 545549    | 738734     | 11853      |
| Roll_R_376_00_41008.tif | 549942    | 739051     | 12035      |
| Roll_R_376_00_41009.tif | 554995    | 739109     | 11999      |
| Roll_R_376_00_41010.tif | 559837    | 739164     | 11697      |
| Roll_R_376_00_41011.tif | 564639    | 739219     | 11307      |
| Roll_R_376_00_41012.tif | 569605    | 739276     | 11313      |
| Roll_R_376_00_41013.tif | 574074    | 739395     | 11395      |
| Roll_R_376_00_41014.tif | 578149    | 739503     | 11606      |

| Label                   | X/Easting | Y/Northing | Z/Altitude |
|-------------------------|-----------|------------|------------|
| Roll_R_376_00_41015.tif | 581953    | 739605     | 11688      |
| Roll_R_376_00_41016.tif | 586185    | 739717     | 11651      |
| Roll_R_376_00_41017.tif | 590262    | 739826     | 11903      |
| Roll_R_376_00_41018.tif | 594724    | 739945     | 13118      |
| Roll_R_376_00_41019.tif | 599048    | 740060     | 11785      |
| Roll_R_376_00_41020.tif | 602922    | 740018     | 11562      |
| Roll_R_376_00_41021.tif | 606943    | 739975     | 11506      |

**Table S4. Easting, northing, and altitude of the camera positions (principal points) for the year 1984 using the Adindan UTM Zone 37 North reference system. Each image indicates the project name, roll number, strip number, and photo number used with file name extension.**

| Label                | X/Easting | Y/Northing | Z/Altitude |
|----------------------|-----------|------------|------------|
| ET1.5_S6_19_1426.tif | 537715.13 | 707143.18  | 9394.86    |
| ET1.5_S6_19_1427.tif | 541948.28 | 707228.87  | 9391.73    |
| ET1.5_S6_19_1428.tif | 546205.37 | 707278.97  | 9396.92    |
| ET1.5_S6_19_1429.tif | 550462.43 | 707333.36  | 9397.13    |
| ET1.5_S6_19_1430.tif | 554770.59 | 707344.83  | 9399.08    |
| ET1.5_S6_19_1431.tif | 559043.44 | 707308.16  | 9401.46    |
| ET1.5_S6_19_1432.tif | 563355.06 | 707157.55  | 9399.01    |
| ET1.5_S6_19_1433.tif | 567694.93 | 706920.63  | 9402.14    |
| ET1.5_S6_19_1434.tif | 572071.86 | 706672.56  | 9400.12    |
| ET1.5_S6_19_1435.tif | 576424.12 | 706437.98  | 9402.79    |
| ET1.5_S6_19_1436.tif | 580853.28 | 706295.13  | 9401.57    |
| ET1.5_S6_19_1437.tif | 585287.96 | 706203.11  | 9401.99    |
| ET1.5_S6_19_1438.tif | 589723.57 | 706116.39  | 9401.69    |
| ET1.5_S6_19_1439.tif | 594137.21 | 706056.37  | 9403.18    |
| ET1.5_S6_19_1440.tif | 598559.98 | 706105.18  | 9401.32    |
| ET1.5_S6_19_1441.tif | 602997.51 | 706199.43  | 9401.14    |
| ET1.5_S6_19_1442.tif | 607422.44 | 706339.78  | 9400.79    |
| ET1.5_S6_19_1443.tif | 611803.85 | 706445.53  | 9395.08    |
| ET1.5_S7_20_1463.tif | 537657.00 | 715589.00  | 9694.00    |
| ET1.5_S7_20_1464.tif | 542055.11 | 715677.15  | 9700.77    |
| ET1.5_S7_20_1465.tif | 546464.93 | 715714.08  | 9710.15    |
| ET1.5_S7_20_1466.tif | 550871.08 | 715769.05  | 9704.97    |
| ET1.5_S7_20_1467.tif | 555249.99 | 715794.04  | 9701.87    |
| ET1.5_S7_20_1468.tif | 559657.74 | 715818.52  | 9705.05    |
| ET1.5_S7_20_1469.tif | 564081.58 | 715846.86  | 9701.59    |
| ET1.5_S7_20_1470.tif | 568504.28 | 715868.26  | 9688.18    |
| ET1.5_S7_20_1471.tif | 572657.60 | 715930.82  | 9688.86    |
| ET1.5_S7_20_1472.tif | 577119.73 | 716026.07  | 9747.25    |
| ET1.5_S7_20_1473.tif | 581504.65 | 716123.27  | 9748.77    |
| ET1.5_S7_20_1474.tif | 585893.71 | 716178.31  | 9751.60    |
| ET1.5_S7_20_1475.tif | 590276.85 | 716190.24  | 9749.19    |
| ET1.5_S7_20_1476.tif | 594673.53 | 716209.84  | 9750.69    |
| ET1.5_S7_20_1477.tif | 599057.07 | 716236.61  | 9747.46    |
| ET1.5_S7_20_1478.tif | 603449.25 | 716250.04  | 9738.47    |
| ET1.5_S7_20_1479.tif | 607856.44 | 716263.38  | 9738.84    |
| ET1.5_S7_20_1480.tif | 612278.02 | 716295.29  | 9725.21    |
| ET1.5_S7_21_1498.tif | 537488.29 | 724251.68  | 9737.99    |
| ET1.5_S7_21_1499.tif | 542179.37 | 724433.21  | 9737.47    |
| ET1.5_S7_21_1500.tif | 546870.28 | 724525.02  | 9732.14    |
| ET1.5_S7_21_1501.tif | 551505.39 | 724522.03  | 9741.79    |
| ET1.5_S7_21_1502.tif | 555852.49 | 724562.98  | 9745.83    |
| ET1.5_S7_21_1503.tif | 560050.05 | 724648.80  | 9745.94    |
| ET1.5_S7_21_1504.tif | 564348.27 | 724599.62  | 9755.78    |
| ET1.5_S7_21_1505.tif | 568721.03 | 724558.87  | 9757.76    |



| Label                  | X/Easting | Y/Northing | Z/Altitude |
|------------------------|-----------|------------|------------|
| ET1.5_S8_21.1_1507.tif | 569564.00 | 724792.00  | 9312.00    |
| ET1.5_S8_21.1_1508.tif | 574120.61 | 724918.33  | 9275.93    |
| ET1.5_S8_21.1_1509.tif | 578707.89 | 724813.11  | 9748.32    |
| ET1.5_S8_21.1_1510.tif | 583366.98 | 724600.63  | 9753.15    |
| ET1.5_S8_21.1_1511.tif | 588023.30 | 724207.61  | 9757.27    |
| ET1.5_S8_21.1_1512.tif | 592681.48 | 723943.00  | 9761.00    |
| ET1.5_S8_21.1_1513.tif | 597389.49 | 723853.51  | 9755.08    |
| ET1.5_S8_21.1_1514.tif | 602022.83 | 723862.92  | 9749.85    |
| ET1.5_S8_21.1_1515.tif | 606627.87 | 723938.40  | 9746.66    |
| ET1.5_S8_21.1_1516.tif | 611646.28 | 724006.93  | 9738.46    |
| ET1.5_S8_22_1533.tif   | 538484.96 | 732853.65  | 9872.71    |
| ET1.5_S8_22_1534.tif   | 543127.24 | 732769.71  | 9882.14    |
| ET1.5_S8_22_1535.tif   | 547727.27 | 732743.86  | 9879.38    |
| ET1.5_S8_22_1536.tif   | 552355.65 | 732672.66  | 9885.13    |
| ET1.5_S8_22_1537.tif   | 557002.09 | 732559.00  | 9888.01    |
| ET1.5_S8_22_1538.tif   | 561643.26 | 732477.72  | 9889.92    |
| ET1.5_S8_22_1539.tif   | 566261.27 | 732398.84  | 9893.80    |
| ET1.5_S8_22_1540.tif   | 570935.31 | 732320.46  | 9898.92    |
| ET1.5_S8_22_1541.tif   | 575567.71 | 732235.27  | 9899.69    |
| ET1.5_S8_22_1542.tif   | 580227.66 | 732238.14  | 9897.46    |
| ET1.5_S8_22_1543.tif   | 584884.85 | 732280.74  | 9899.99    |
| ET1.5_S8_22_1544.tif   | 589517.13 | 732375.52  | 9900.06    |
| ET1.5_S8_22_1545.tif   | 594264.90 | 732508.14  | 9904.64    |
| ET1.5_S8_22_1546.tif   | 599508.26 | 732748.53  | 9898.63    |
| ET1.5_S8_22_1547.tif   | 604725.11 | 733119.97  | 9898.85    |
| ET1.5_S8_22_1548.tif   | 609943.03 | 733437.81  | 9883.32    |
| ET1.5_S8_23_1569.tif   | 540791.33 | 742540.22  | 10047.72   |
| ET1.5_S8_23_1570.tif   | 544802.96 | 742849.56  | 10043.49   |
| ET1.5_S8_23_1571.tif   | 548827.45 | 743113.53  | 10049.56   |
| ET1.5_S8_23_1572.tif   | 552761.21 | 743371.94  | 10049.13   |
| ET1.5_S8_23_1573.tif   | 556756.38 | 743624.57  | 10045.97   |
| ET1.5_S8_23_1574.tif   | 560874.06 | 743882.47  | 10047.39   |
| ET1.5_S8_23_1575.tif   | 565002.60 | 744135.24  | 10046.84   |
| ET1.5_S8_23_1576.tif   | 569137.67 | 744366.35  | 10048.57   |
| ET1.5_S8_23_1577.tif   | 573278.88 | 744383.93  | 10048.68   |
| ET1.5_S8_23_1578.tif   | 577419.97 | 744122.93  | 10046.81   |
| ET1.5_S8_23_1579.tif   | 581580.41 | 743629.95  | 10048.96   |
| ET1.5_S8_23_1580.tif   | 585726.89 | 743162.20  | 10050.96   |
| ET1.5_S8_23_1581.tif   | 589915.56 | 742721.18  | 10051.03   |
| ET1.5_S8_23_1582.tif   | 594050.89 | 742281.51  | 10052.31   |
| ET1.5_S8_23_1583.tif   | 598193.25 | 741877.35  | 10049.58   |
| ET1.5_S8_23_1584.tif   | 602360.77 | 741469.15  | 10050.16   |
| ET1.5_S8_23_1585.tif   | 606501.75 | 741130.75  | 10046.25   |
| ET1.5_S9_24_1606.tif   | 539991.95 | 748682.13  | 10512.99   |
| ET1.5_S9_24_1607.tif   | 544070.86 | 748589.15  | 10512.57   |
| ET1.5_S9_24_1608.tif   | 548158.39 | 748494.07  | 10516.00   |
| ET1.5_S9_24_1609.tif   | 552287.53 | 748386.11  | 10510.73   |

| Label                | X/Easting | Y/Northing | Z/Altitude |
|----------------------|-----------|------------|------------|
| ET1.5_S9_24_1610.tif | 556356.00 | 748276.55  | 10512.72   |
| ET1.5_S9_24_1611.tif | 560128.14 | 748177.11  | 10524.38   |
| ET1.5_S9_24_1612.tif | 563856.99 | 748115.63  | 10510.28   |
| ET1.5_S9_24_1613.tif | 567612.03 | 748179.53  | 10516.04   |
| ET1.5_S9_24_1614.tif | 571416.60 | 748238.89  | 10515.52   |
| ET1.5_S9_24_1615.tif | 575182.46 | 748356.96  | 10514.84   |
| ET1.5_S9_24_1616.tif | 578974.43 | 748590.82  | 10519.25   |
| ET1.5_S9_24_1617.tif | 582704.53 | 748872.14  | 10514.06   |
| ET1.5_S9_24_1618.tif | 586452.46 | 749164.97  | 10513.82   |
| ET1.5_S9_24_1619.tif | 590163.30 | 749468.62  | 10515.69   |
| ET1.5_S9_24_1620.tif | 593924.63 | 749856.52  | 10516.53   |
| ET1.5_S9_24_1621.tif | 597799.82 | 750264.25  | 10515.84   |
| ET1.5_S9_24_1622.tif | 602366.82 | 750870.05  | 10515.12   |
| ET1.5_S9_24_1623.tif | 606955.65 | 751318.31  | 10516.88   |
| ET1.5_S9_24_1624.tif | 611767.82 | 751696.73  | 10517.01   |
| ET1.5_S9_25_1643.tif | 537753.95 | 758435.58  | 10517.27   |
| ET1.5_S9_25_1644.tif | 542312.53 | 758580.54  | 10517.72   |
| ET1.5_S9_25_1645.tif | 546773.14 | 758740.20  | 10516.02   |
| ET1.5_S9_25_1646.tif | 551016.07 | 758870.13  | 10512.21   |
| ET1.5_S9_25_1647.tif | 555287.40 | 758960.57  | 10514.26   |
| ET1.5_S9_25_1648.tif | 559552.10 | 759023.85  | 10512.16   |
| ET1.5_S9_25_1649.tif | 563821.75 | 759075.27  | 10515.61   |
| ET1.5_S9_25_1650.tif | 568068.92 | 759098.97  | 10516.42   |
| ET1.5_S9_25_1651.tif | 572334.28 | 759141.85  | 10520.26   |
| ET1.5_S9_25_1652.tif | 576538.16 | 759063.07  | 10523.91   |
| ET1.5_S9_25_1653.tif | 580757.54 | 758937.20  | 10521.26   |
| ET1.5_S9_25_1654.tif | 584968.94 | 758701.11  | 10523.80   |
| ET1.5_S9_25_1655.tif | 588912.23 | 758550.61  | 10526.56   |
| ET1.5_S9_25_1656.tif | 592927.11 | 758417.68  | 10528.73   |
| ET1.5_S9_25_1657.tif | 596838.61 | 758210.44  | 10526.30   |
| ET1.5_S9_25_1658.tif | 600708.07 | 757949.12  | 10527.67   |
| ET1.5_S9_25_1659.tif | 604587.74 | 757672.09  | 10525.87   |
| ET1.5_S9_25_1660.tif | 607965.56 | 757457.74  | 10531.74   |
| ET1.5_S9_26_1680.tif | 540897.75 | 766860.46  | 10527.52   |
| ET1.5_S9_26_1681.tif | 545154.19 | 766837.59  | 10522.06   |
| ET1.5_S9_26_1682.tif | 549424.51 | 766818.17  | 10525.47   |
| ET1.5_S9_26_1683.tif | 553737.26 | 766811.28  | 10524.54   |
| ET1.5_S9_26_1684.tif | 558025.41 | 766854.66  | 10525.24   |
| ET1.5_S9_26_1685.tif | 562319.54 | 767025.97  | 10530.73   |
| ET1.5_S9_26_1686.tif | 566643.27 | 767135.73  | 10533.71   |
| ET1.5_S9_26_1687.tif | 570960.83 | 767148.36  | 10527.54   |
| ET1.5_S9_26_1688.tif | 575278.77 | 767180.85  | 10532.91   |
| ET1.5_S9_26_1689.tif | 579637.74 | 767276.99  | 10524.99   |
| ET1.5_S9_26_1690.tif | 584007.87 | 767455.68  | 10531.76   |
| ET1.5_S9_26_1691.tif | 588359.29 | 767639.24  | 10530.51   |
| ET1.5_S9_26_1692.tif | 592737.27 | 767723.56  | 10521.86   |
| ET1.5_S9_26_1693.tif | 597153.36 | 767815.60  | 10522.55   |

| Label                | X/Easting | Y/Northing | Z/Altitude |
|----------------------|-----------|------------|------------|
| ET1.5_S9_26_1694.tif | 601522.63 | 767915.79  | 10526.12   |
| ET1.5_S9_26_1695.tif | 605927.12 | 767937.66  | 10513.47   |
| ET1.5_S9_26_1696.tif | 610317.55 | 767910.81  | 10522.04   |
| ET1.5_S9_27_1714.tif | 538310.03 | 775575.97  | 10509.62   |
| ET1.5_S9_27_1715.tif | 543115.33 | 775604.96  | 10505.21   |
| ET1.5_S9_27_1716.tif | 547867.92 | 775477.19  | 10511.35   |
| ET1.5_S9_27_1717.tif | 552579.85 | 775356.01  | 10508.91   |
| ET1.5_S9_27_1718.tif | 557223.22 | 775316.51  | 10514.62   |
| ET1.5_S9_27_1719.tif | 561763.57 | 775333.96  | 10515.06   |
| ET1.5_S9_27_1720.tif | 566261.85 | 775361.59  | 10513.26   |
| ET1.5_S9_27_1721.tif | 570388.83 | 775391.17  | 10517.81   |
| ET1.5_S9_27_1722.tif | 574380.05 | 775417.40  | 10515.87   |
| ET1.5_S9_27_1723.tif | 578326.44 | 775450.86  | 10521.31   |
| ET1.5_S9_27_1724.tif | 582289.96 | 775490.61  | 10520.18   |
| ET1.5_S9_27_1725.tif | 586189.88 | 775527.50  | 10518.29   |

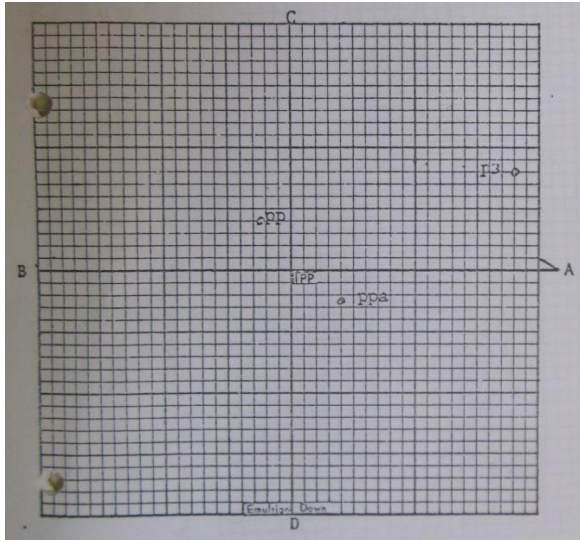

Figure S3. Fiducial mark orientation of KC-1(B) camera used to acquire the 1967 HAPs (source: picture taken from the calibration certificate document inside Ethiopian Geospatial Information Institute).

Table S5. Fiducial point coordinates of KC-1(B) camera used to acquire the 1967 HAPs (mm).

| Point                            | X        | Y        |
|----------------------------------|----------|----------|
| A                                | 120.428  | 0.000    |
| B                                | -117.419 | 0.000    |
| C                                | 0.006    | 117.465  |
| D                                | -0.006   | -117.596 |
| Principal point                  | 0.009    | 0.009    |
| Principal point symmetry         | 0.020    | 0.006    |
| Principal point auto collimation | 0.015    | 0.023    |

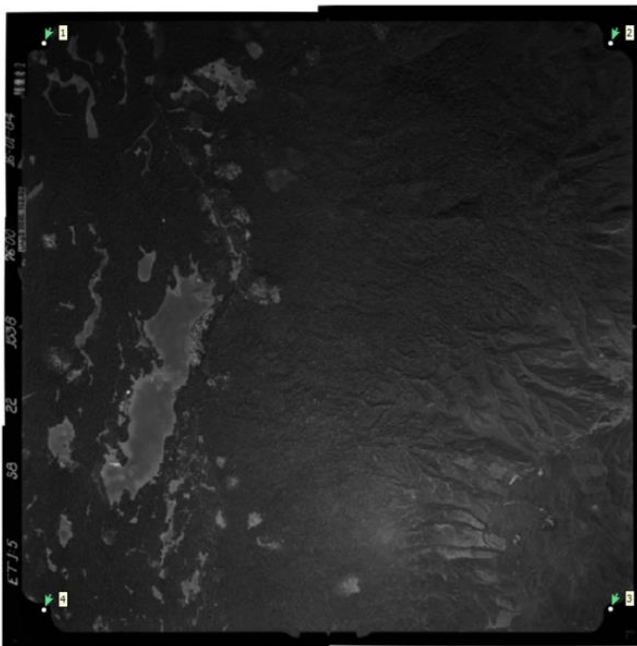

Figure S4. Fiducial mark orientation of Wild RC 10 camera, UAG II 3045 used to acquire the 1984 HAPs (source background: Ethiopian Geospatial Information Institute).

Table S6. Fiducial point coordinates of the Wild RC 10 camera used to acquire the 1984 HAPs (mm).

| Point                            | X        | Y        |
|----------------------------------|----------|----------|
| 1                                | -105.997 | +106.00  |
| 2                                | +105.994 | +106.00  |
| 3                                | +106.005 | -106.00  |
| 4                                | -106.001 | -105.997 |
| Fiducial centre                  | 0.000    | 0.000    |
| Principal point symmetry         | -0.013   | +0.008   |
| Principal point auto collimation | +0.012   | -0.006   |

**Table S7. Ground control points used for processing historical aerial photographs for the years 1967 and 1984 using the Adindan UTM Zone 37 North reference system.**

| 1967   |           |            |            | 1984   |           |            |            |
|--------|-----------|------------|------------|--------|-----------|------------|------------|
| Label  | X/Easting | Y/Northing | Z/Altitude | Label  | X/Easting | Y/Northing | Z/Altitude |
| GCP 1  | 542670.00 | 760290.00  | 2927.0     | GCP 1  | 590007.61 | 754371.54  | 4284.0     |
| GCP 2  | 573896.65 | 762188.10  | 3784.0     | GCP 2  | 604782.00 | 748797.00  | 3487.0     |
| GCP 3  | 590007.61 | 754371.54  | 4284.0     | GCP 3  | 541486.73 | 745287.65  | 2906.9     |
| GCP 4  | 598370.00 | 754695.00  | 4026.0     | GCP 4  | 563715.72 | 742751.64  | 1894.3     |
| GCP 5  | 577668.72 | 742529.64  | 2309.4     | GCP 5  | 543127.73 | 733679.65  | 2168.0     |
| GCP 6  | 574836.00 | 748778.00  | 3284.0     | GCP 6  | 577409.15 | 748680.23  | 3047.0     |
| GCP 7  | 563965.72 | 738686.64  | 1807.0     | GCP 7  | 595504.13 | 735689.24  | 2479.0     |
| GCP 8  | 554858.73 | 739177.65  | 2480.2     | GCP 8  | 547946.00 | 773026.00  | 2492.0     |
| GCP 9  | 554497.00 | 749063.00  | 2698.0     | GCP 9  | 573609.00 | 773443.00  | 3488.0     |
| GCP 10 | 545277.00 | 748360.00  | 3280.0     | GCP 10 | 606183.00 | 763414.00  | 3594.0     |
| GCP 11 | 542122.73 | 739019.65  | 2603.4     | GCP 11 | 594248.78 | 740548.63  | 3611.4     |
| GCP 12 | 551087.73 | 737187.65  | 2516.2     | GCP 12 | 554858.73 | 739177.65  | 2480.2     |
| GCP 13 | 604843.71 | 745305.63  | 3286.4     | GCP 13 | 557479.72 | 734734.65  | 3032.5     |
| GCP 14 | 604085.70 | 734959.63  | 1577.8     | GCP 14 | 551087.73 | 737187.65  | 2516.2     |
| GCP 15 | 594603.71 | 743598.63  | 3704.8     | GCP 15 | 571152.72 | 734271.64  | 1770.1     |
| GCP 16 | 543127.73 | 733679.65  | 2168.0     | GCP 16 | 585077.71 | 734716.64  | 1920.8     |
| GCP 17 | 545807.73 | 743245.65  | 3076.5     | GCP 17 | 560800.72 | 735135.65  | 2156.2     |
| GCP 18 | 550149.73 | 734102.65  | 2253.1     | GCP 18 | 603742.12 | 735542.24  | 1609.0     |
| GCP 19 | 571152.72 | 734271.64  | 1770.1     | GCP 19 | 559212.72 | 725877.65  | 2297.4     |
| GCP 20 | 584750.71 | 743716.64  | 3124.9     | GCP 20 | 582792.71 | 725097.65  | 1708.5     |
| GCP 21 | 585077.71 | 734716.64  | 1920.8     | GCP 21 | 570162.72 | 725669.65  | 1722.5     |
| GCP 22 | 607113.70 | 738426.63  | 1911.7     | GCP 22 | 594263.70 | 726911.64  | 1935.7     |
| GCP 23 | 560800.72 | 735135.65  | 2156.2     | GCP 23 | 603975.70 | 729614.64  | 1706.1     |
| GCP 24 | 608758.12 | 741019.23  | 2069.0     | GCP 24 | 539248.73 | 725519.66  | 2319.2     |
| GCP 25 | 596821.14 | 749115.23  | 3853.0     | GCP 25 | 607128.11 | 718891.25  | 1242.0     |
| GCP 26 | 562138.17 | 744357.24  | 1952.0     | GCP 26 | 575789.14 | 708745.27  | 1399.0     |
| GCP 27 | 590468.17 | 739349.76  | 2332.0     | GCP 27 | 544777.18 | 711893.28  | 1840.0     |
| GCP 28 | 595504.13 | 735689.24  | 2479.0     |        |           |            |            |
| GCP 29 | 596187.02 | 756801.59  | 4131.0     |        |           |            |            |
| GCP 30 | 558209.17 | 755864.23  | 3377.0     |        |           |            |            |
| GCP 31 | 589444.14 | 749070.23  | 3864.0     |        |           |            |            |
| GCP 32 | 603160.13 | 756946.22  | 3718.0     |        |           |            |            |
| GCP 33 | 572718.70 | 756616.12  | 3513.0     |        |           |            |            |
| GCP 34 | 586126.24 | 781658.28  | 3198.0     |        |           |            |            |
| GCP 35 | 600765.00 | 788851.00  | 2538.0     |        |           |            |            |
| GCP 36 | 546048.00 | 787236.00  | 2331.0     |        |           |            |            |
| GCP 37 | 547946.00 | 773026.00  | 2492.0     |        |           |            |            |
| GCP 38 | 600499.00 | 774231.00  | 2964.0     |        |           |            |            |
| GCP 39 | 573057.00 | 788056.00  | 3308.0     |        |           |            |            |
| GCP 40 | 573609.00 | 773443.00  | 3488.0     |        |           |            |            |
| GCP 41 | 603014.00 | 763242.00  | 3672.0     |        |           |            |            |

|        |           |           |         |
|--------|-----------|-----------|---------|
| GCP 42 | 578731.55 | 762338.12 | 3822.00 |
| GCP 43 | 546273.00 | 754283.00 | 3130.00 |
| GCP 44 | 578344.00 | 753994.00 | 3427.00 |
| GCP 45 | 548203.73 | 726303.65 | 2026.80 |
| GCP 46 | 559212.72 | 725877.65 | 2297.40 |
| GCP 47 | 570162.72 | 725669.65 | 1722.50 |
| GCP 48 | 583102.71 | 725497.65 | 1716.00 |
| GCP 49 | 598316.70 | 728967.64 | 1976.90 |

**Table S8. List of zipped folders, filenames, DOI's, and content description and structure of available datasets for the years 1967 and 1984.**

| Dataset | 1967                                                                                                                                 | 1984                                                                                                                                 | Content description                                                                                                                                                                                                                                                                                                                          |
|---------|--------------------------------------------------------------------------------------------------------------------------------------|--------------------------------------------------------------------------------------------------------------------------------------|----------------------------------------------------------------------------------------------------------------------------------------------------------------------------------------------------------------------------------------------------------------------------------------------------------------------------------------------|
| 1       | 1967_Scanned_HAPs_Part1.7z and<br>1967_Scanned_HAPs_Part2.7z                                                                         | 1984_Scanned_HAPs_Part1.7z and<br>1984_Scanned_HAPs_Part2.7z                                                                         | Unprocessed scanned aerial Photographs are available at <a href="https://doi.org/10.5281/zenodo.7271617">https://doi.org/10.5281/zenodo.7271617</a> (Muhammed et al., 2022a). All are in Tiff format except four photographs in JPEG format.                                                                                                 |
| 2       | Camera_Position.zip<br>PP_1967.txt                                                                                                   | PP_1984.txt                                                                                                                          | Camera position coordinates (principal point coordinates) data zipped folder containing text file available at <a href="https://doi.org/10.5281/zenodo.7271617">https://doi.org/10.5281/zenodo.7271617</a> (Muhammed et al., 2022a).                                                                                                         |
| 3       | Flight_Index.zip and GCP.zip<br>PP_1967.shp and<br>flight_index_1967.shp<br>GCP_1967.txt                                             | PP_1984.shp and<br>flight_index_1984.shp<br>GCP_1984.txt                                                                             | Flight index shapefile data are zipped into one folder named "Flight_Index.zip" with four shape files and ground control point data are zipped into one folder named "GCP.zip" containing text files, and available at <a href="https://doi.org/10.5281/zenodo.7271617">https://doi.org/10.5281/zenodo.7271617</a> (Muhammed et al., 2022a). |
| 4       | DEM_1967.7z containing<br>1967_DEM.tif<br>1967_Orthomosaic.7z<br>containing<br>1967_orthomosaic.tif                                  | DEM_1984.7z containing<br>1984_DEM.tif<br>1984_Orthomosaic.7z<br>containing<br>1984_orthomosaic.tif                                  | The results of photogrammetric processing are available at <a href="https://doi.org/10.5281/zenodo.7269999">https://doi.org/10.5281/zenodo.7269999</a> (Muhammed et al., 2022b) digital elevation model and orthomosaics                                                                                                                     |
|         | Data_Examples.Zip and Accuracy_assessment.7z                                                                                         |                                                                                                                                      | Data extracted from the resulted study area for the volumetric calculation and visualization are available at <a href="https://doi.org/10.5281/zenodo.7269999">https://doi.org/10.5281/zenodo.7269999</a> (Muhammed et al., 2022b)                                                                                                           |
| 5       | PP_1967.shp<br>flight_index_1967.shp<br>DE1_Orthomosaic_1967.tif<br>DE2_Orthomosaic_1967.tif<br>DE1_DEM_1967.tif<br>DE2_DEM_1967.tif | PP_1984.shp<br>flight_index_1984.shp<br>DE1_Orthomosaic_1984.tif<br>DE2_Orthomosaic_1984.tif<br>DE1_DEM_1984.tif<br>DE2_DEM_1984.tif | A point shapefile that has easting, northing, and altitude of the exposure station<br>A polygon showing coverage of a single aerial photograph and overlap of all historical aerial photographs<br>Clipped orthomosaic for data examples 1 and 2<br>Clipped elevation data used for volumetric calculation                                   |

**Table S9. The values and settings used for processing the historical aerial photographs in each step.**

| Major steps                                                        | Values and settings                                                                                                                                                     |
|--------------------------------------------------------------------|-------------------------------------------------------------------------------------------------------------------------------------------------------------------------|
| Add Photos                                                         | Import references                                                                                                                                                       |
| Reference settings                                                 | Coordinate system for camera and marker reference: Adindan / UTM Zone 37N (EPSG::20137); Rotation angles: Omega, Phi, Kappa                                             |
| Camera calibration settings                                        | Camera type: frame; enable rolling shutter compensation: unchecked; film camera with fiducial marks: enabled; focal length: 152.822 mm                                  |
| Image alignment                                                    | Accuracy: highest; generic preselection: yes; reference preselection: source; key point limit: 100,000; tie point limit: 10,000; exclude stationary tie points: checked |
| Settings for contrast enhancement                                  | Down sampling and denoising                                                                                                                                             |
| Gradual selection and removal of the outliers and erroneous points | Three-stage selection based on reconstruction uncertainty: 10; reprojection error: 0.57; projection accuracy: 6                                                         |
| Optimisation of the sparse point cloud                             | Parameters: f, cx, cy, B1, B2, K1, K2, K3, K4, P1, and P2                                                                                                               |
| Dense point cloud generation                                       | Quality: ultra-high; depth filtering mode: aggressive; calculate point colours; checked: calculate point confidence; checked                                            |
| Dense points cloud classification parameters                       | Max angle (°): 37.5; max distance (m): 0.5; cell size (m): 30                                                                                                           |
| DEM generation                                                     | Source data: dense cloud; Interpolation: enabled; point classes: ground                                                                                                 |
| Calibrate colours                                                  | Source data: DEM; calibrate white balance: checked                                                                                                                      |
| Orthomosaic generation                                             | Surface: DEM; blending mode: mosaic; enable hole filling checked; refine seamlines: checked                                                                             |
